# Supplementary material
Source: bioRxiv or medRxiv preprint supplement (https://www.biorxiv.org/highwire/filestream/50257/field_highwire_adjunct_files/0/168518-1.pdf)
Supplement: Supplementary file [file 168518-1.pdf]

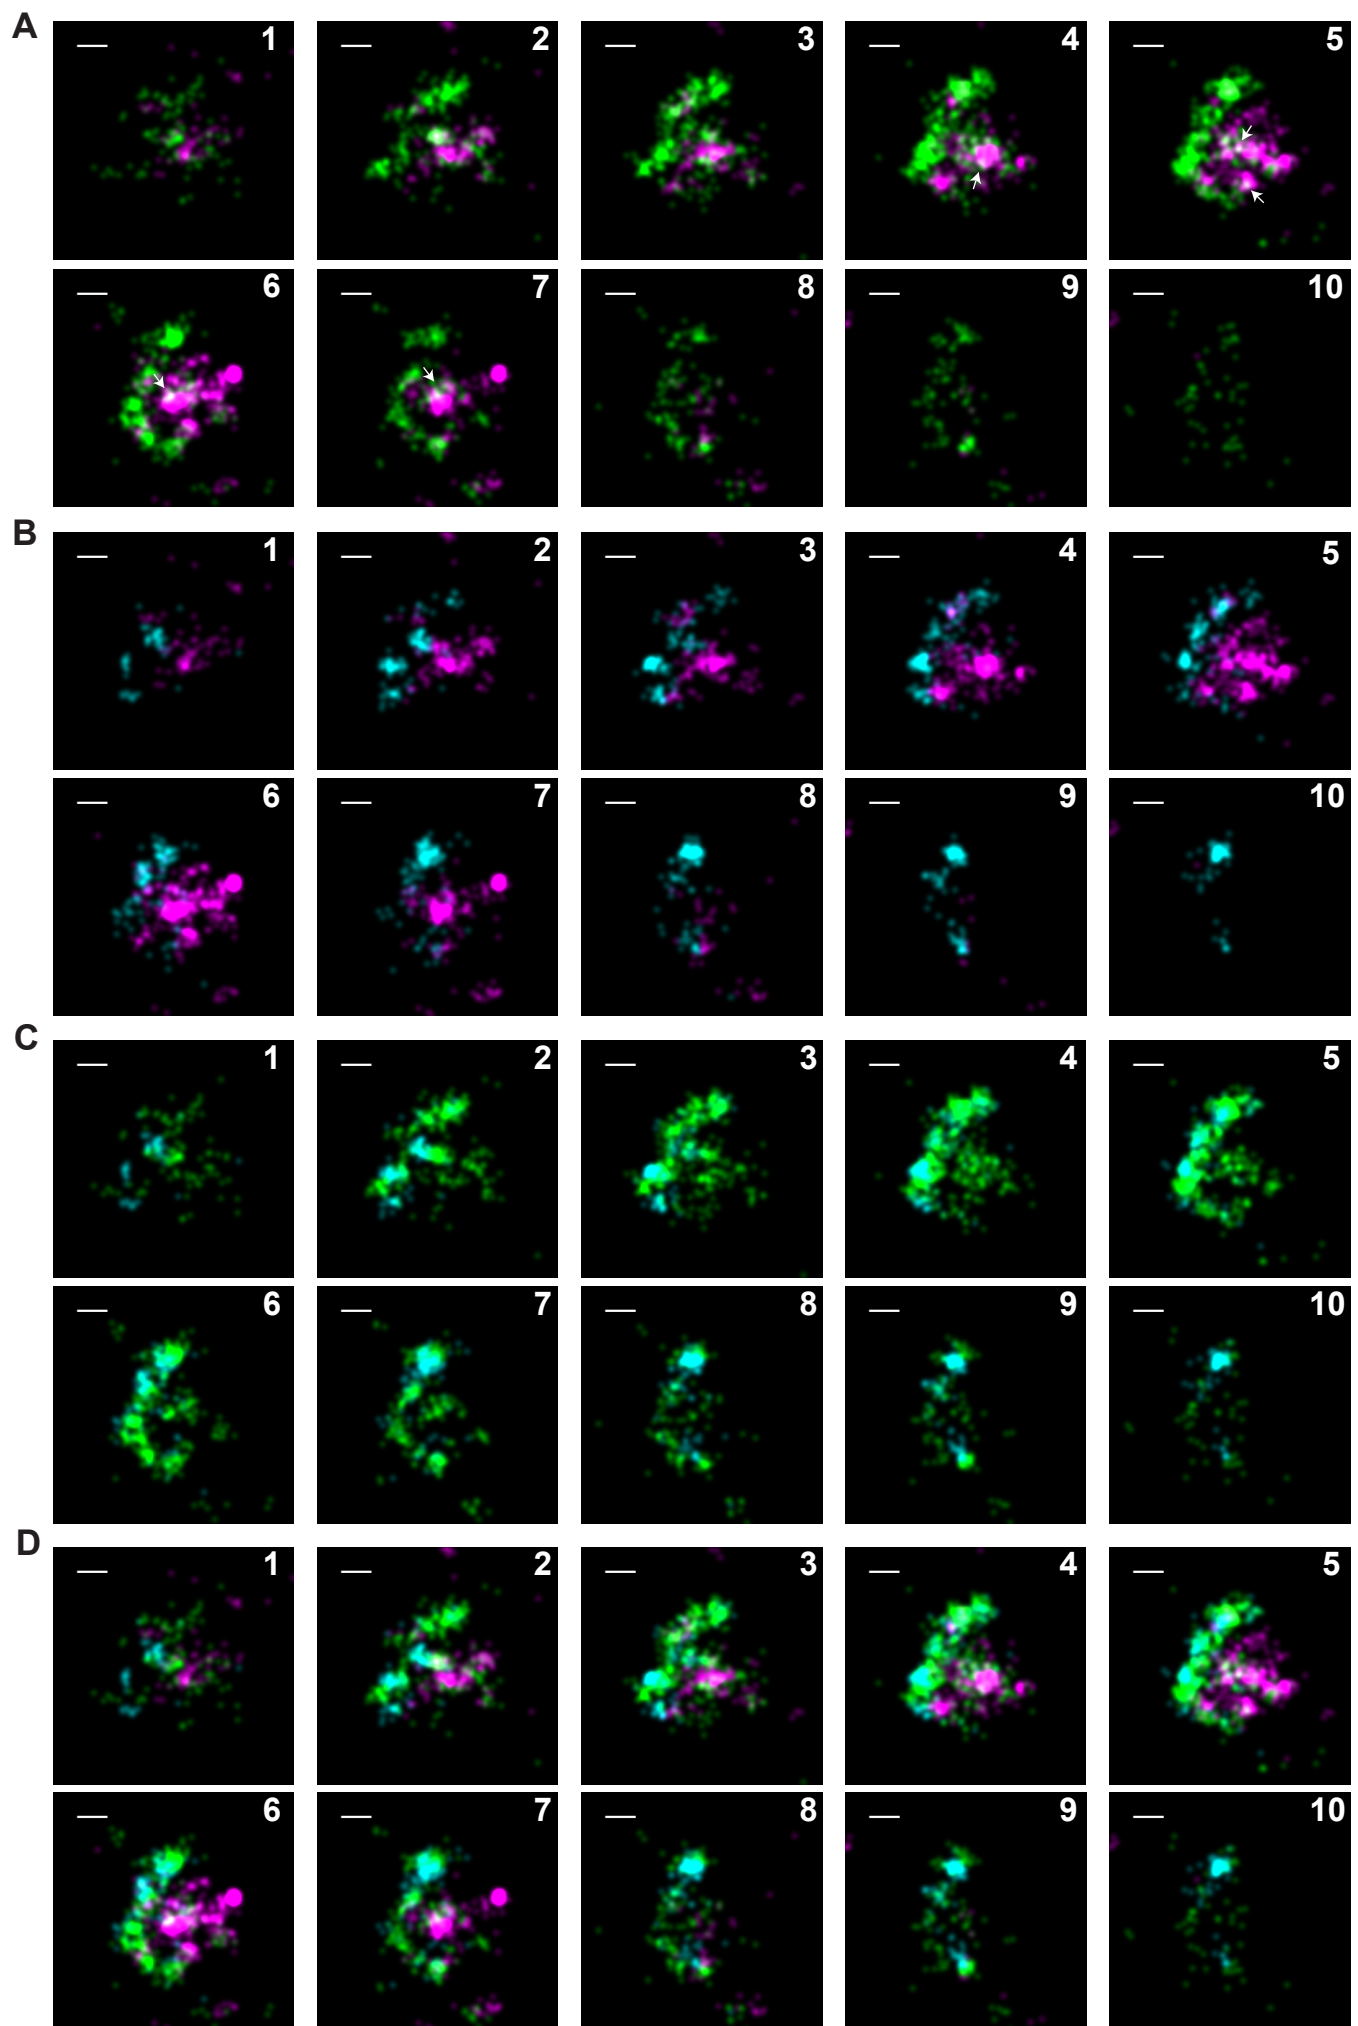

Appendix Figure S1
